# Supplementary material
Source: publisher site journal article supplement (https://www.degruyterbrill.com/publication/isbn/9783486700107/downloadAsset/9783486700107_Buchinformation.pdf)
Supplement: Supplementary file 1 [file 9783486700107_Buchinformation.pdf]

Wissenschaftlich kompetent und verständlich

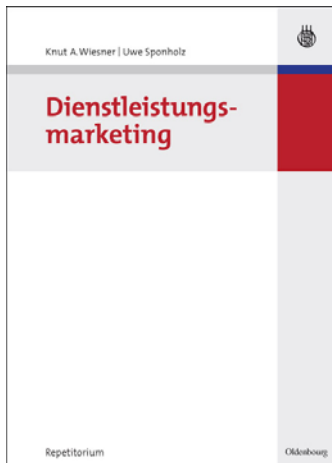

Knut Wiesner

## Dienstleistungsmarketing

2007 I 230 S. I Br.

€ 27,80

ISBN 978-3-486-58209-3

Dieses Buch berücksichtigt die Besonderheiten, Gemeinsamkeiten und Unterschiede des Dienstleistungsmarketings sowohl für eigenständige als auch für produktergänzende Dienstleistungen. Zentrale Bedeutung haben Kundenorientierung und ein strategischer Marketingansatz, der allen zukunftsorientierten unternehmerischen Herausforderungen gerecht wird.

---

Das Repetitorium richtet sich an Studierende an Universitäten, Fachhochschulen und Akademien, die sich schnell und verständlich in die Materie einarbeiten und sich zielgerichtet auf Prüfungen vorbereiten möchten, wie auch an Lehrende, die Anregungen für ihre Veranstaltungen und Prüfungen suchen.

---

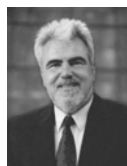

Prof. Dr. Knut Wiesner lehrt und forscht seit mehr als 6 Jahren an der Fachhochschule Würzburg-Schweinfurt sowie weiteren Hochschulen in den Bereichen Marketing, Unternehmensführung und Internationalem Management.

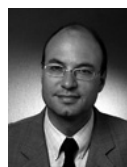

Prof. Dr. Uwe Sponholz ist seit 2003 Professor für B2B-Marketing, strategische Unternehmensplanung und Rechnungswesen im Fachbereich Wirtschaftsingenieurwesen und Betriebswirtschaft an der Fachhochschule in Schweinfurt.

[oldenbourg.de](http://oldenbourg.de)

### Pressereferat

Oldenbourg Wissenschaftsverlag I Rosenheimer Str. 145 I 81679 München  
Tel.: +49 89 45051-467 I Fax: +49 89 45051-292 I [kuttig@oldenbourg.de](mailto:kuttig@oldenbourg.de)

Alle Veröffentlichungen des Oldenbourg Verlags sind über den Buchhandel zu beziehen.  
Bei Lieferung fallen Versandgebühren an. Rezensionsexemplare auf Anforderung.
